# Supplementary material
Source: PubMed Central journal article supplement (PMC4345604)
Supplement: pnas.201416878SI.pdf [file pnas.201416878SI.pdf]

# Supporting Information

Gibbons et al. 10.1073/pnas.1416878112

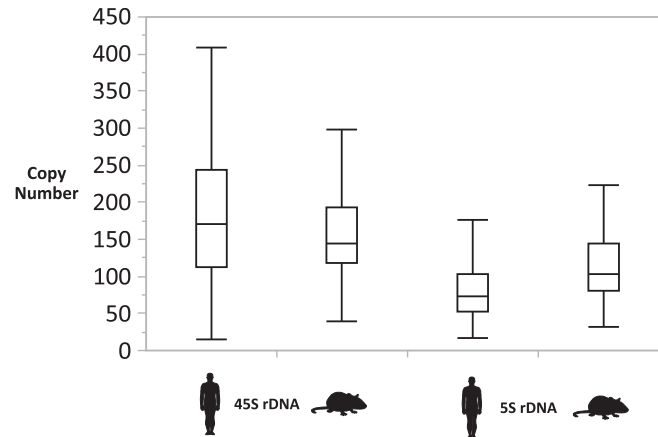

**Fig. S1.** 5S and 45S rDNA CN display extensive variability. Box plots of 5S and 45S rDNA CN in humans and mice. Box borders represent first and third quartiles, the horizontal line inside the box is the median, whiskers extend to one and one half times the interquartile range, and points represent outliers. The y axis reports haploid CN.

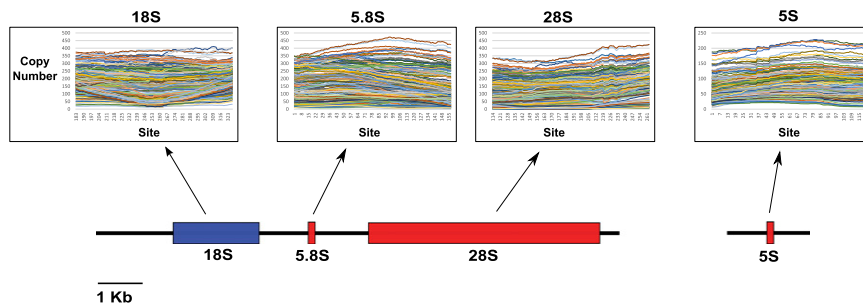

**Fig. S2.** rDNA CN estimates display low variance along selected segments in each rDNA component. CN estimates (y axis) per site (x axis) for segments of each 45S rDNA component (A–C) for the 168 human individuals. Segments exhibit low variance in CN estimates across sites and no nucleotide variation between human and mouse genomes (*Materials and Methods*). The nucleotide sites in each segment are reported below the line graphs.



**Table S1. Spearman correlations and associated P values between 5S rDNA CN and 45S rDNA CN**

| Copy     | Combined (n = 168) |          | CEU (n = 90) |          | YRI (n = 78)  |          | Male (n = 77) |          | Female (n = 91) |          |
|----------|--------------------|----------|--------------|----------|---------------|----------|---------------|----------|-----------------|----------|
|          | $\rho$             | P value  | $\rho$       | P value  | $\rho$        | P value  | $\rho$        | P value  | $\rho$          | P value  |
| Human    |                    |          |              |          |               |          |               |          |                 |          |
| 18S      | 0.61               | 2.00E-18 | 0.54         | 8.80E-08 | 0.68          | 4.00E-12 | 0.55          | 3.00E-07 | 0.62            | 3.00E-11 |
| 5.8S     | 0.80               | 3.00E-38 | 0.73         | 1.00E-15 | 0.83          | 8.00E-22 | 0.77          | 3.00E-16 | 0.79            | 3.00E-21 |
| 28S      | 0.73               | 4.00E-29 | 0.67         | 1.00E-12 | 0.79          | 3.00E-18 | 0.70          | 2.00E-12 | 0.73            | 2.00E-16 |
| 45S rDNA | 0.74               | 1.00E-30 | 0.68         | 7.00E-13 | 0.80          | 6.00E-19 | 0.70          | 2.00E-12 | 0.74            | 2.00E-17 |
|          | Combined (n = 27)  |          | Lab (n = 17) |          | Wild (n = 10) |          |               |          |                 |          |
| Mouse    |                    |          |              |          |               |          |               |          |                 |          |
| 18S      | 0.64               | 0.0004   | 0.50         | 0.042    | 0.52          | 0.128    |               |          |                 |          |
| 5.8S     | 0.78               | 1.30E-06 | 0.60         | 0.011    | 0.83          | 0.003    |               |          |                 |          |
| 28S      | 0.73               | 1.50E-05 | 0.57         | 0.017    | 0.44          | 0.200    |               |          |                 |          |
| 45S rDNA | 0.77               | 2.40E-06 | 0.60         | 0.012    | 0.65          | 0.043    |               |          |                 |          |

Data are shown for the correlation between estimates of CN for the 5S rDNA locus vs. individual components of the 45S locus (18S, 5.8S, and 28S), and the entire 45S rDNA locus (average of 18S, 5.8S and 28S; *Methods*).

**Table S2. Population samples used for the experimental evaluation of cCNV**

| Individuals from CEU origin (n = 15)                                                                                                   | Individuals from Autism collection (n = 12)                                                                 | Families (n = 3)                      | Ethnically diverse individuals (n = 29)                                                                                                                                                            |
|----------------------------------------------------------------------------------------------------------------------------------------|-------------------------------------------------------------------------------------------------------------|---------------------------------------|----------------------------------------------------------------------------------------------------------------------------------------------------------------------------------------------------|
| NA12872, NA12812, NA12814, NA12234, NA12873, NA12874, NA12875, NA12827, NA12828, NA12829, NA12830, NA12763, NA12716, NA12751, NA12043. | NA10021, NA10022, NA10023, NA10033, NA10038, NA10039, NA10139, NA10140, NA10143, NA10144, NA10145, NA10149. | Family 1447, Family 1456, Family 1459 | 12ZF6, 5BM3X, YCCZ6, WLB37, ZIUU4, 2KGZW, 15WN4, NQSUI, KXZ6O, XDMNS, 7PYWG, 8TDIN, MWMLL, 1AL7A, 6MC7I, K2NRJ, 61KQ5, XLFF1, Q3AE3, S8SNY, X79QS, K5L23, XH8QD, 2N42J, BNPO5, UMYA7, QYQPK, YAW38 |

Further information on population samples and experimental evaluation of cCNV is provided in *Methods*.

**Table S3. Sequence of primers used for qPCR analysis**

| Gene      | Forward primer            | Reverse primer            |
|-----------|---------------------------|---------------------------|
| TP53      | 5'TGTCCTTCCTGGAGCGATCT3'  | 5'CAAACCCTGGTTTAGCACTTC3' |
| 5S rDNA   | 5'TCGTCTGATCTCGGAAGCTAA3' | 5'AAGCCTACAGCACCCGGTAT3'  |
| 5.8S rDNA | 5'CGACTCTTAGCGGTGGATCA3'  | 5'GATCAATGTGTCCTGCAATTC3' |
| 18S rDNA  | 5'GACTCAACACGGGAAACCTC3'  | 5'AGACAAATCGCTCCACCAAC3'  |
| 28S rDNA  | 5'GCGGGTGGTAAACTCATCT3'   | 5'CACGCCCTCTGAACTCTCT3'   |

Further information on qPCR is provided in *Methods*.
